# Supplementary material for: Interfacing CuO, CuBi 2 O 4 , and protective metal oxide layers to boost solar-driven photoelectrochemical hydrogen evolution
Source: Royal Society of Chemistry journal article supplement (doi:10.1039/d4dt02738h), 2024-12-04
Supplement: d4dt02738h1.pdf [file d4dt02738h1.pdf]

## Electronic supporting information for ‘Interfacing CuO, CuBi<sub>2</sub>O<sub>4</sub>, and protective metal oxide layers to boost solar-driven photoelectrochemical hydrogen evolution.’

Cathal Burns<sup>a,b</sup>, Owen Woodford<sup>b</sup>, Susanna L Stephens<sup>b</sup>, Muhammed Rishan<sup>a,b</sup>, Linsey Fuller<sup>c</sup>, Shafeer Kalathil<sup>a\*</sup>, Elizabeth A Gibson<sup>b\*</sup>

- a)** Hub for Biotechnology in the Built Environment, Faculty of Health and Life Sciences, Department of Applied Sciences, Northumbria University, Newcastle, NE1 8ST, United Kingdom
- b)** Energy Materials Laboratory, Chemistry, School of Natural and Environmental Science, Newcastle University, Newcastle upon Tyne, NE1 7RU, UK
- c)** Procter & Gamble Innovation Centre, Whitley Road, Newcastle upon Tyne, NE12 9BZ, United Kingdom

### Table of Contents

|                                                                               |           |
|-------------------------------------------------------------------------------|-----------|
| <b>Additional Characterization of CuBi<sub>2</sub>O<sub>4</sub></b> .....     | <b>2</b>  |
| X-ray Diffraction.....                                                        | <b>2</b>  |
| <b>Additional Characterization of CuO CuBi<sub>2</sub>O<sub>4</sub></b> ..... | <b>2</b>  |
| X-ray Photoelectron Spectroscopy .....                                        | <b>2</b>  |
| Absorbance, Reflectance and Tauc Plots .....                                  | <b>4</b>  |
| SEM and EDS .....                                                             | <b>6</b>  |
| <b>SEM</b> .....                                                              | <b>8</b>  |
| <b>Electrochemistry</b> .....                                                 | <b>11</b> |
| <b>Gas Chromatography</b> .....                                               | <b>12</b> |
| <b>Post-PEC Characterization</b> .....                                        | <b>12</b> |
| <b>Additional Tandem Characterization</b> .....                               | <b>14</b> |
| <b>Transient Absorption Spectroscopy Data</b> .....                           | <b>15</b> |
| <b>Literature Comparison</b> .....                                            | <b>15</b> |
| <b>References</b> .....                                                       | <b>17</b> |

## Additional Characterization of $\text{CuBi}_2\text{O}_4$

### X-ray Diffraction

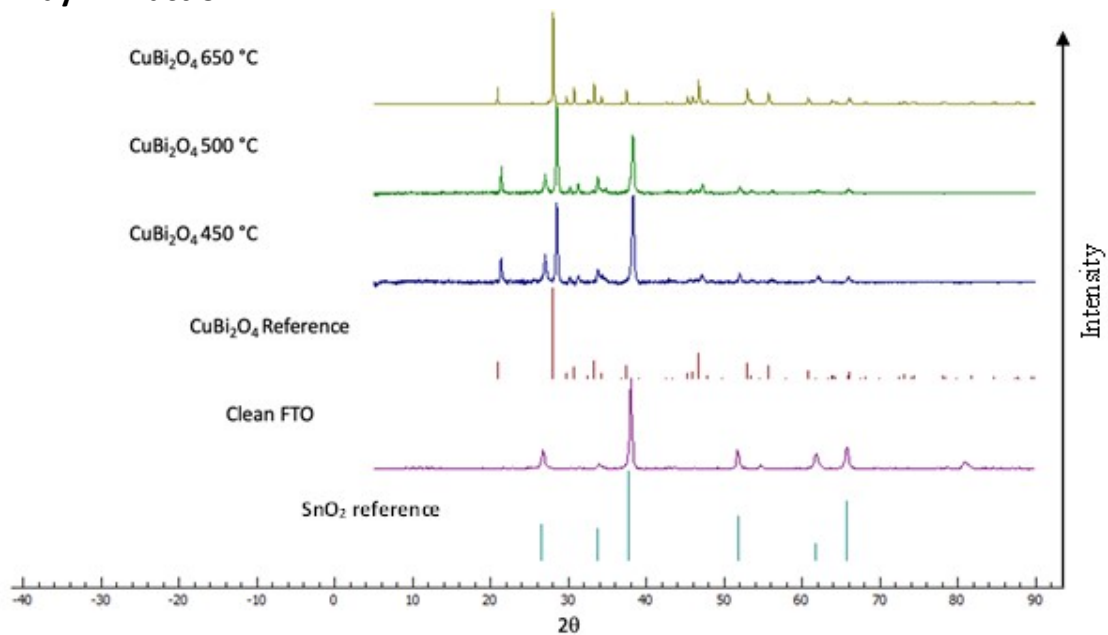

**Figure S1** – X-ray diffractograms of  $\text{CuBi}_2\text{O}_4$  at 450 °C, 500 °C, and 650 °C. FTO,  $\text{SnO}_2$  reference diffractograms and a  $\text{CuBi}_2\text{O}_4$  reference diffractogram from the literature (kusachiite, PDF no.00-042-0334).

## Additional Characterization of $\text{CuO} | \text{CuBi}_2\text{O}_4$

### X-ray Photoelectron Spectroscopy

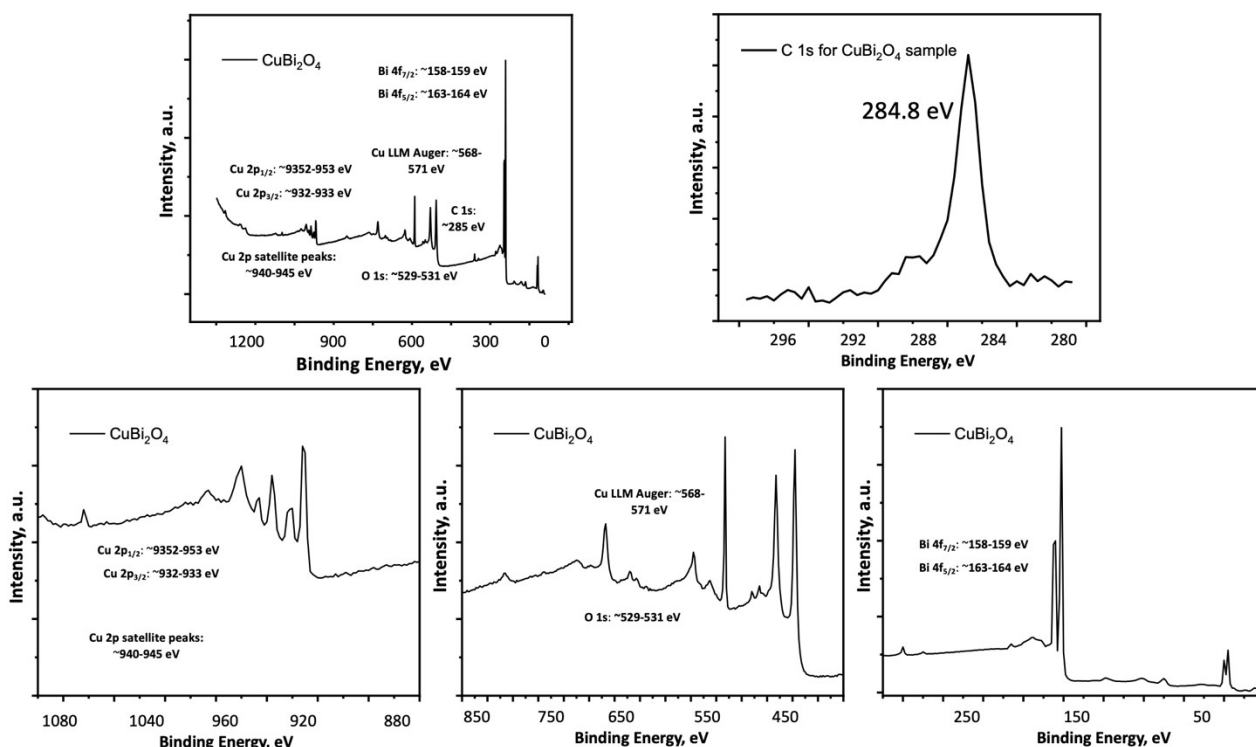

Figure S2 – a-e) XPS survey scans of  $\text{CuBi}_2\text{O}_4$  showing the Cu 2p, Cu LLM Auger peaks, O 1s, C1s and Bi 4f peaks.

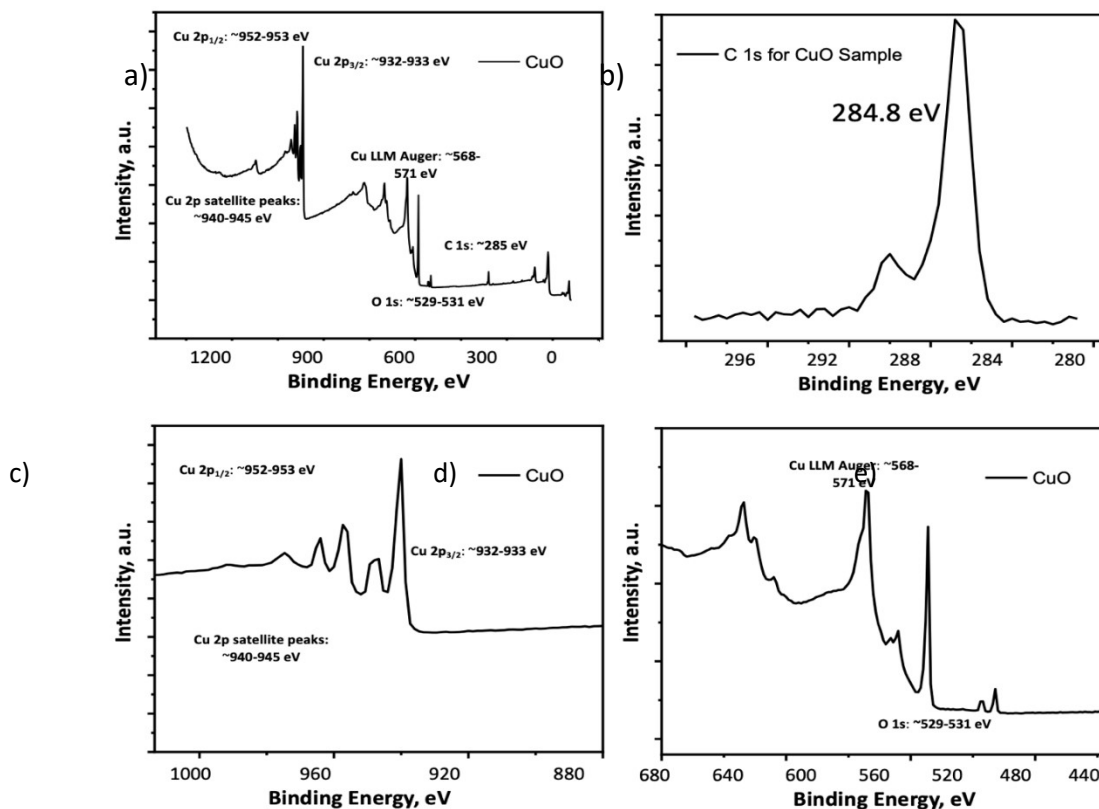

Figure S3 – a-d) XPS survey scans of  $\text{CuO}$  (bottom) showing Cu 2p, Cu LLM Auger peaks, O 1s, and C 1s peaks.

### Survey Scans

a)

b) 3

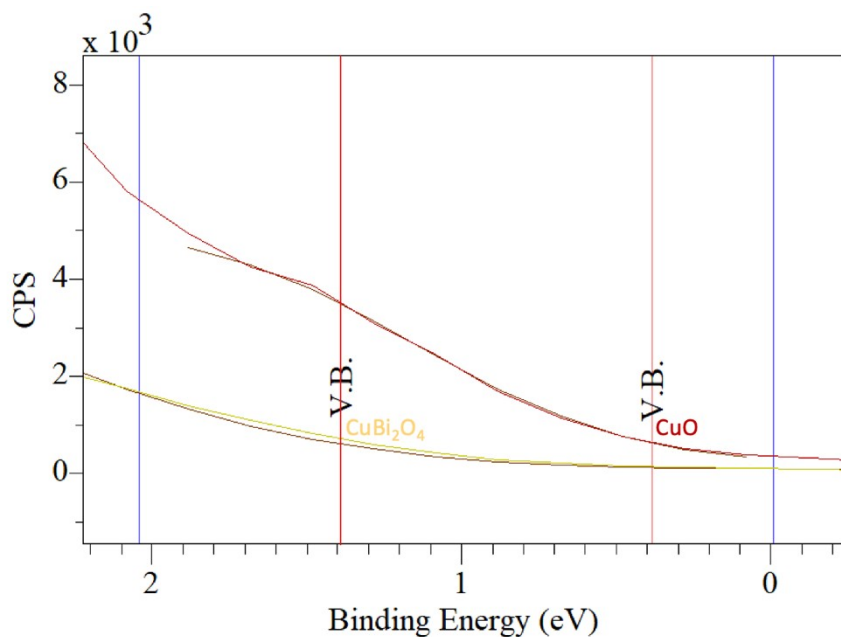

**Figure S4** – Valence band X-ray photoelectron plot of CuO (red) and CuBi<sub>2</sub>O<sub>4</sub> (yellow). The red vertical lines indicate the valence band positions (V.B.) for each material.

### Valence Band Calculation

| Material                         | Binding energies vs Fermi level (eV) |
|----------------------------------|--------------------------------------|
| CuO                              | 0.38                                 |
| CuBi <sub>2</sub> O <sub>4</sub> | 1.40                                 |

The valence band (VB) binding energy relative to the Fermi level ( $E_{VB,F}$ ) is defined as the difference between the VB maximum and the Fermi level. The Fermi level is defined as the highest energy an electron can have at absolute zero. In a semiconductor, the Fermi level lies between the VB and conduction band (CB). The Fermi level lies close to the VB in p-type

**Table S1** – Calculated valence bands of CuO and CuBi<sub>2</sub>O<sub>4</sub>.

To calculate the VB energy vs Vacuum:  $E_{VB,Vac} = E_{VB,F} - F$

F = Work function of a material

F-CuO = ~4.7-5.3 eV      F-CuBi<sub>2</sub>O<sub>4</sub> = ~4.7-5.3 eV

Valence band vs Vacuum:

CuBi<sub>2</sub>O<sub>4</sub> = ~ 5.9 eV      CuO = ~4.88 eV

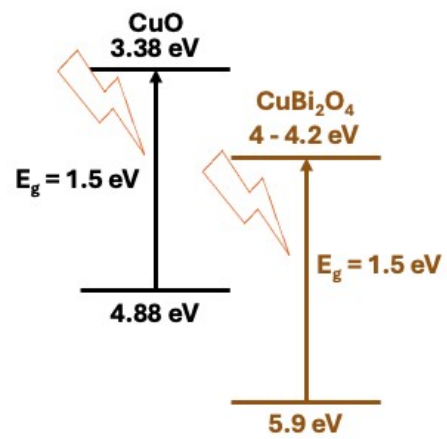

### Absorbance, Reflectance and Tauc Plots

Figure S5 – Calculated band structure of the CuO|CuBi<sub>2</sub>O<sub>4</sub> heterojunction.

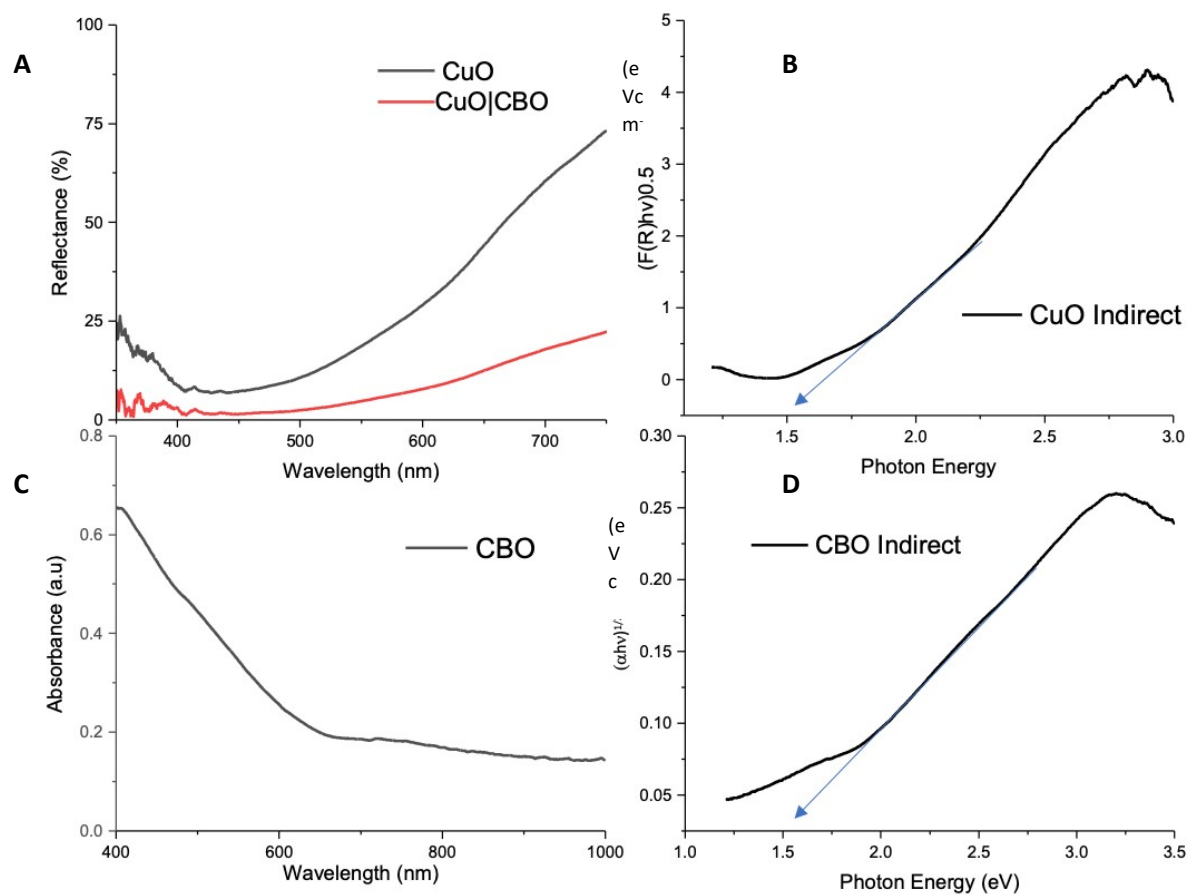

**Figure S6** – **A)** Reflectance spectrum of CuO, and CuO|CuBi<sub>2</sub>O<sub>4</sub>. **B)** Tauc plot of CuO assuming an indirect bandgap. **C)** Absorbance spectrum of a CuBi<sub>2</sub>O<sub>4</sub> film. **D)** Tauc plot for CuBi<sub>2</sub>O<sub>4</sub> assuming an indirect bandgap.

## SEM and EDS

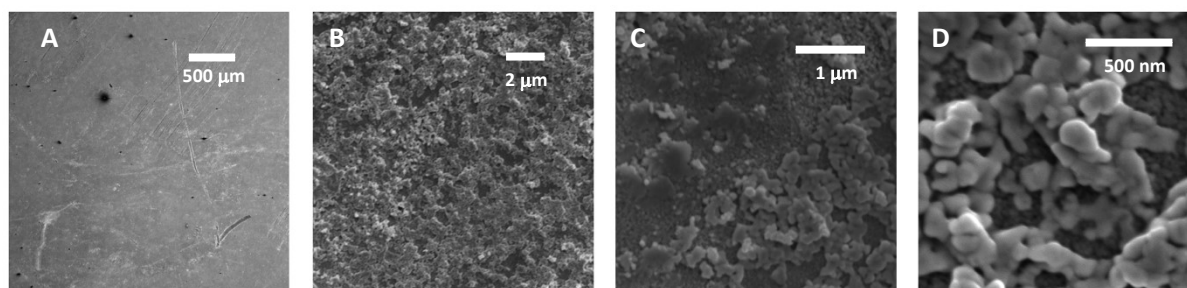

**Figure S7** - SEM images of the CuO|CuBi<sub>2</sub>O<sub>4</sub> electrodes. **A)** View field = 2.99 mm, magnification 118 x, and working distance (WD) = 11.64 mm. **B)** View field = 14.2 μm, magnification 24.8 kx, and working distance (WD) = 10.63 mm. **C)** View field = 4.15 μm, magnification 84.7 kx, and working distance (WD) = 10.64 mm. **D)** View field = 1.64 μm, magnification 215 kx, and working distance (WD) = 10.62 mm. (In-beam secondary electron detector with high voltage (HV)= 5.0keV for all images.)

Supporting Information

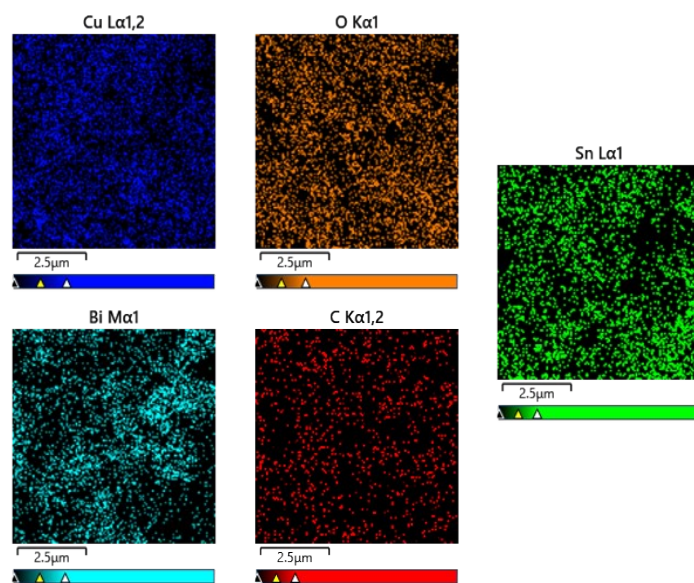

**Figure S8** – SEM-EDS of FTO|CuO|CuBi<sub>2</sub>O<sub>4</sub>. The results show elemental mapping showing that Cu, Bi, O, C and Sn (from the FTO glass) can be found at the surface of the sample.

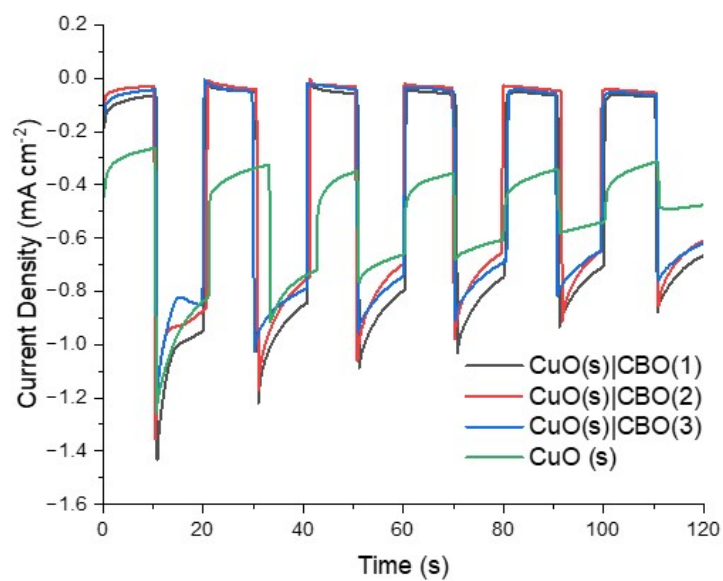

**Figure S9** – Chopped-light chronoamperometry of CuO and CuO|CuBi<sub>2</sub>O<sub>4</sub> with 1-3 layers of CuBi<sub>2</sub>O<sub>4</sub> at 0.4 V vs RHE.



## SEM

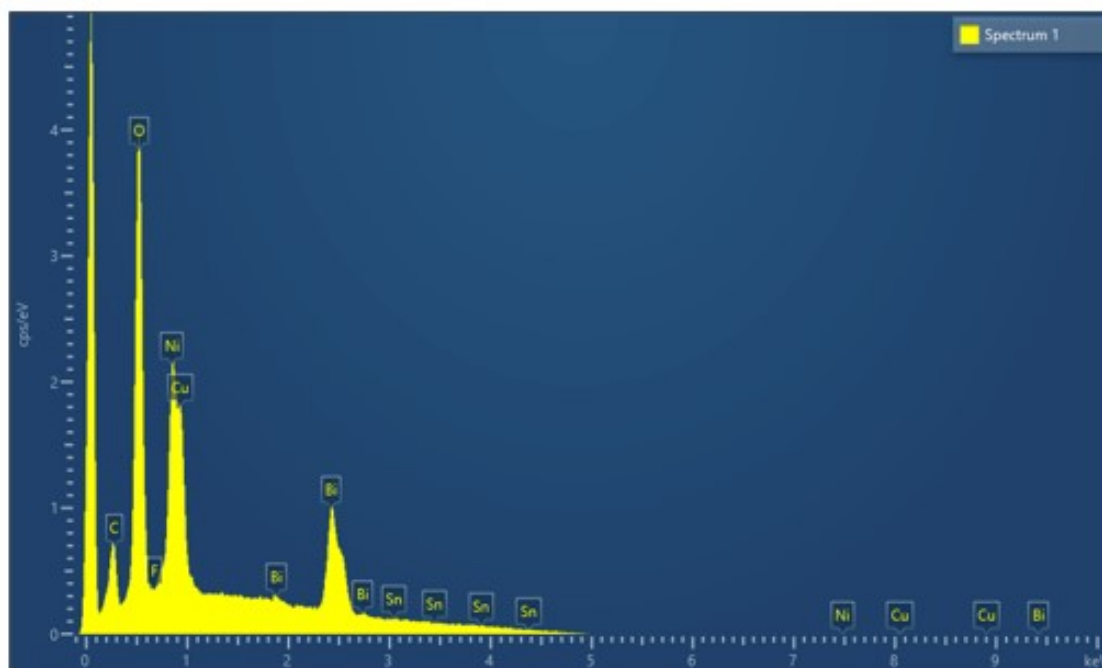

| Element | Signal | Weight % | $\sigma$ |
|---------|--------|----------|----------|
| Bi      |        | 53.57    | 0.63     |
| Ni      |        | 17.53    | 0.38     |
| O       |        | 15.17    | 0.25     |
| Cu      |        | 11.72    | 0.30     |
| C       |        | 1.75     | 0.09     |
| F       |        | 0.26     | 0.13     |
| Sn      |        | 0.00     | 1.97     |

Figure S10 – SEM-EDS data of FTO|CuO|CuBi<sub>2</sub>O<sub>4</sub>|NiO.

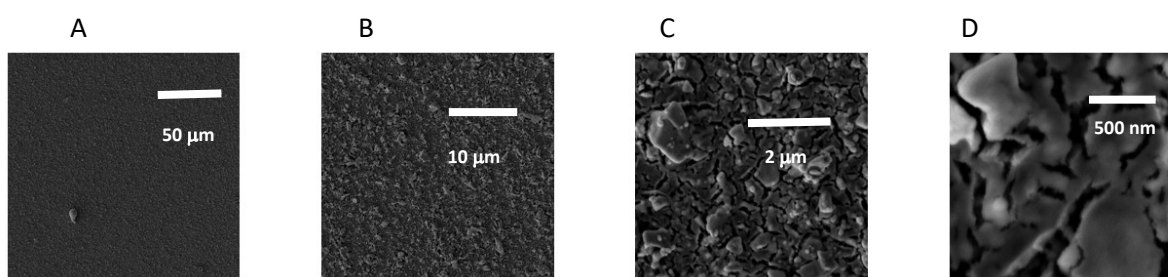

Figure S11 - SEM images of the CuO|CuBi<sub>2</sub>O<sub>4</sub>|NiO electrodes. A) View field = 192 μm, magnification 915 x, and working distance (WD) = 12.33 mm. B) View field = 32 μm, magnification 5.51 kx, and working distance (WD) = 12.36 mm. C) View field = 6.51 μm, magnification 27.0 kx, and working distance (WD) = 12.36 mm. D) View field = 1.62 μm, magnification 109 kx, and working distance (WD) = 12.36 mm. (Secondary electron detector with high voltage (HV)= 5.0keV for all images.)

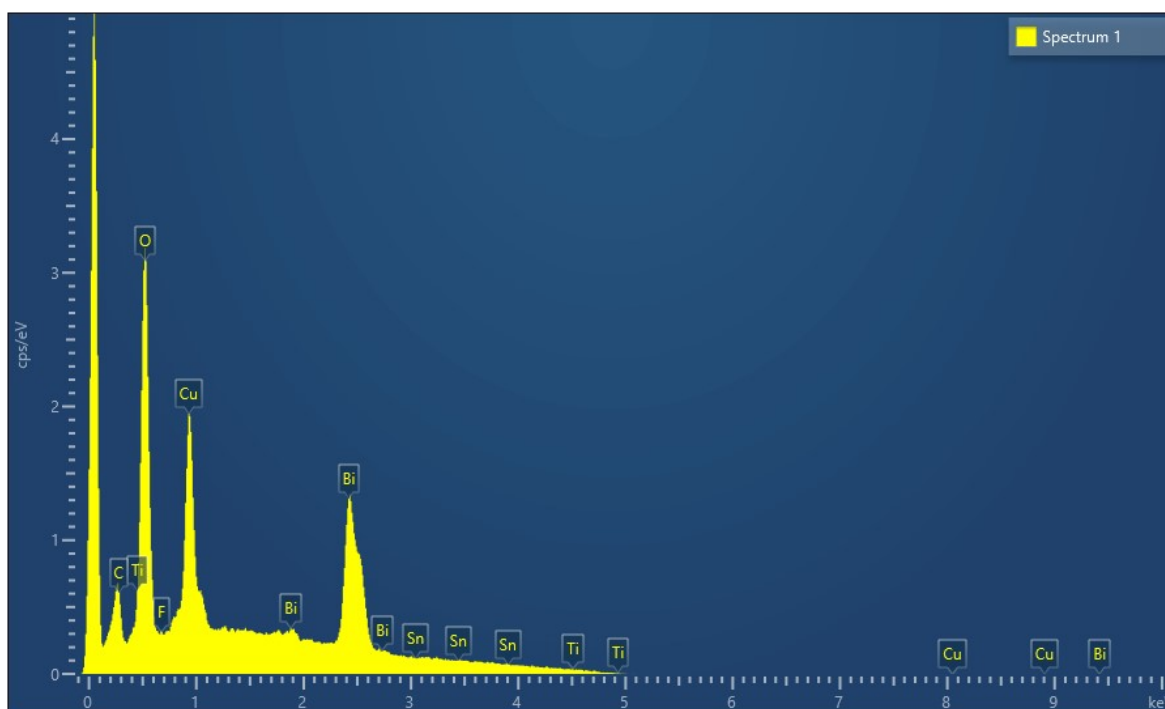

| Element Signal | Weight % | $\sigma$ |
|----------------|----------|----------|
| Bi             | 69.96    | 1.41     |
| Cu             | 13.98    | 0.38     |
| O              | 12.27    | 0.32     |
| C              | 1.29     | 0.09     |
| Sn             | 1.25     | 1.89     |
| Na             | 1.25     | 0.10     |
| F              | 0.00     | 0.11     |
| Ti             | 0.00     | 2.90     |

Figure S12 - SEM-EDS data of  $\text{FTO}|\text{CuO}|\text{CuBi}_2\text{O}_4|\text{TiO}_2$ .

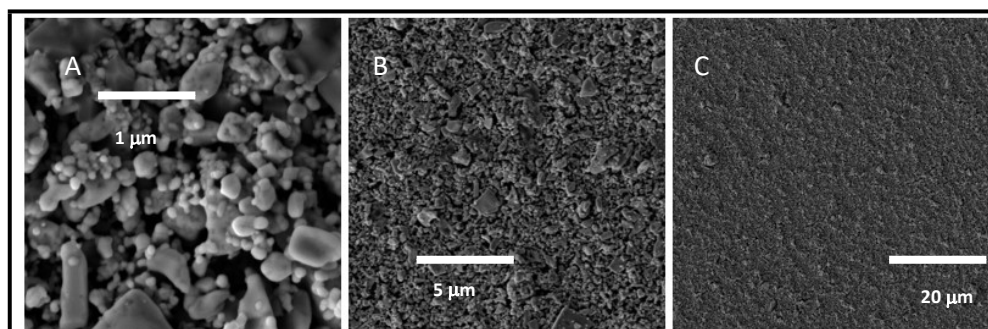

Figure S13 – SEM images of  $\text{CuO}|\text{CuBi}_2\text{O}_4|\text{TiO}_2$ . A) View field = 3.21 μm, magnification 73.2 kx, and working distance (WD) = 12.16 mm. B). View field = 15.7 μm, magnification 14.9 kx, and working distance (WD) = 12.17 mm. C) View field = 64.8 μm, magnification 2.72 kx, and working distance (WD) = 12.17 mm. (Secondary electron detector with high voltage (HV)= 5.0keV for all images.)

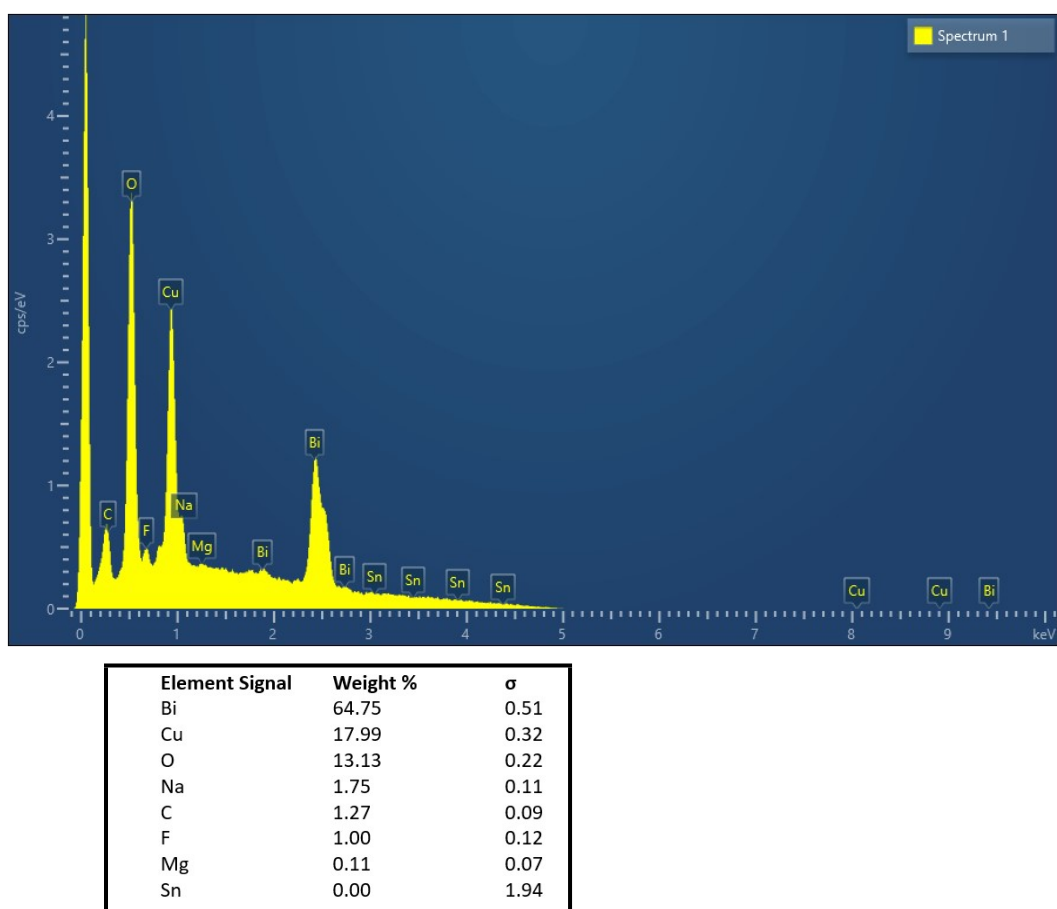

Figure S14 – SEM-EDS data of  $\text{CuO}|\text{CuBi}_2\text{O}_4|\text{MgO}$ .

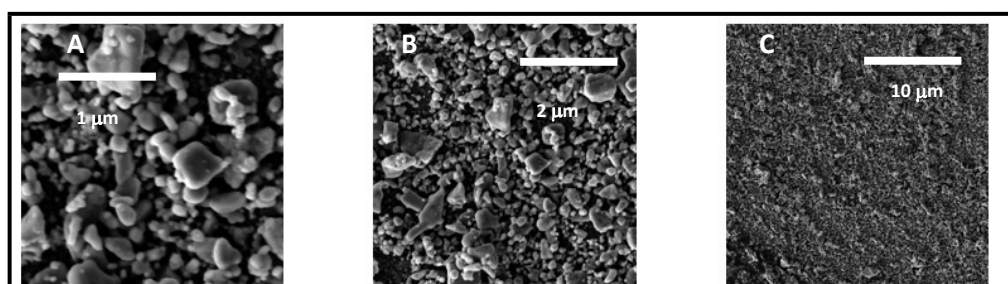

Figure S15 - SEM images of  $\text{CuO}|\text{CuBi}_2\text{O}_4|\text{MgO}$ . A) View field =  $3.19\ \mu\text{m}$ , magnification 73.6 kx, and working distance (WD) = 12.69 mm. B). View field =  $6.86\ \mu\text{m}$ , magnification 34.2 kx, and working distance (WD) = 12.7 mm. C) View field =  $31.7\ \mu\text{m}$ , magnification 7.4 kx, and working distance (WD) = 12.71 mm. (Secondary electron detector with high voltage (HV)= 5.0 keV for all images.)

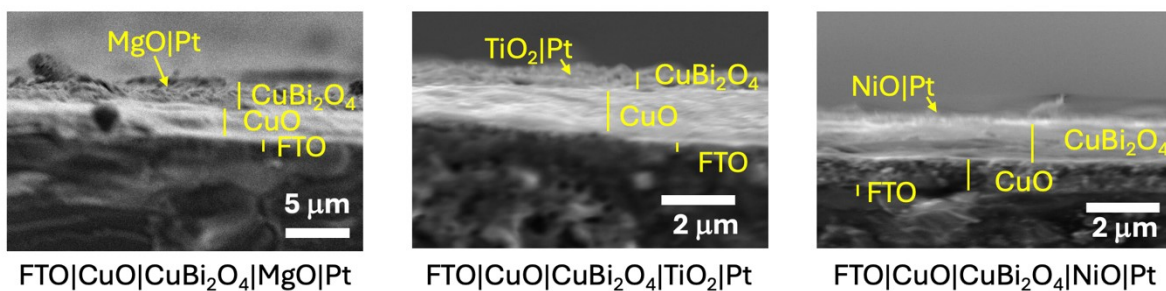

**Figure S16** – Cross sectional SEM images of A) CuO|CuBi<sub>2</sub>O<sub>4</sub>|NiO|Pt, B) CuO|CuBi<sub>2</sub>O<sub>4</sub>|TiO<sub>2</sub>|Pt, and C) CuO|CuBi<sub>2</sub>O<sub>4</sub>|MgO|Pt. A secondary electron detector with high voltage (HV)= 5.0 keV for all images.

## Electrochemistry

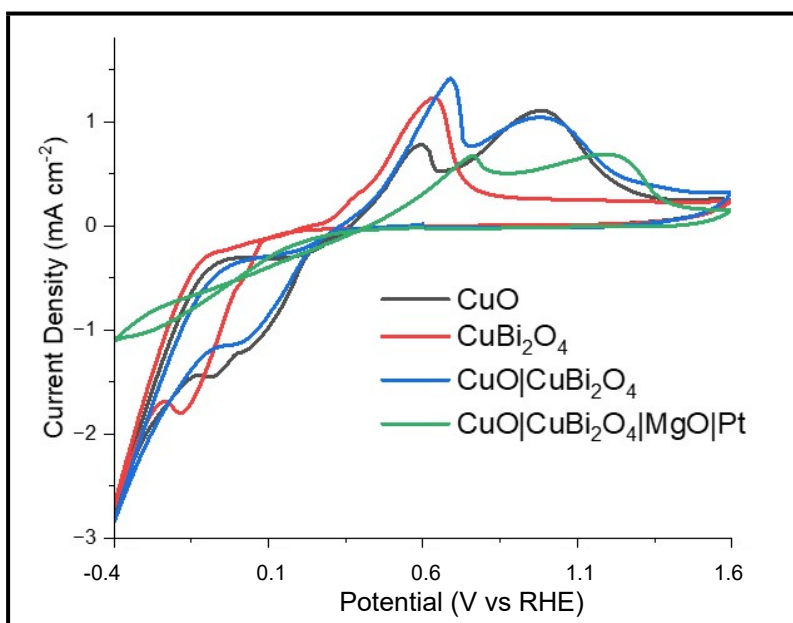

**Figure S17** – Cyclic voltammetry of CuO, CuBi<sub>2</sub>O<sub>4</sub>, CuO|CuBi<sub>2</sub>O<sub>4</sub>, and CuO|CuBi<sub>2</sub>O<sub>4</sub>|MgO|Pt. Scan rate = 10 mV s<sup>-1</sup>.

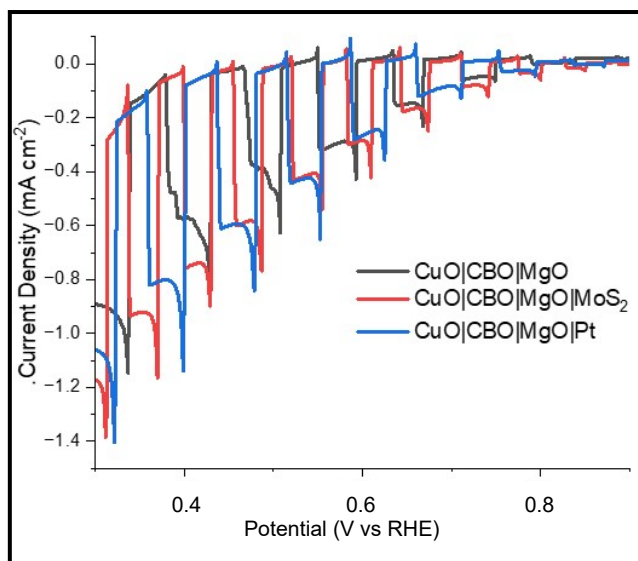

Figure S18 - Chopped Light LSV's comparing the effects of Pt and MoS<sub>2</sub> HER co-catalysts on CuO|CuBi<sub>2</sub>O<sub>4</sub>|MgO.

## Gas Chromatography

| Reaction Time (mins) | Applied V vs Ag/AgCl | pH  | Charge passed          | Electrons passed (mol) | Headspace volume (L) | H <sub>2</sub> peak | H <sub>2</sub> ppm | [H <sub>2</sub> ] / mol | Faradaic efficiency (%) |
|----------------------|----------------------|-----|------------------------|------------------------|----------------------|---------------------|--------------------|-------------------------|-------------------------|
| 60                   | -0.2                 | 7.2 | 2.41x10 <sup>-1</sup>  | 1.25 x10 <sup>-6</sup> | 0.02                 | 2461                | 357                | 1.18 x10 <sup>-6</sup>  | 95%                     |
| 120                  | -0.2                 | 7.2 | 5.00 x10 <sup>-1</sup> | 2.59 x10 <sup>-6</sup> | 0.02                 | 4654                | 686                | 2.27 x10 <sup>-6</sup>  | 88%                     |
| 180                  | -0.2                 | 7.2 | 7.60 x10 <sup>-1</sup> | 3.94 x10 <sup>-6</sup> | 0.02                 | 7405                | 1097               | 3.63 x10 <sup>-6</sup>  | 92%                     |

Table S2 – Table showing the faradaic efficiency calculations of the CuO|CuBi<sub>2</sub>O<sub>4</sub>|MgO|Pt PEC cell at -0.2V vs Ag/AgCl with Pt wire as counter electrode. Experiments were carried out in a custom-built glass cell without an ion exchange membrane separating the counter and working electrodes.

| ppm  | mg m <sup>-3</sup> | g/m <sup>-3</sup> | mol m <sup>-3</sup> | mol dm <sup>-3</sup>    | mol                    |
|------|--------------------|-------------------|---------------------|-------------------------|------------------------|
| 357  | 29.27              | 0.029             | 0.06                | 5.90 x10 <sup>-5</sup>  | 1.18 x10 <sup>-6</sup> |
| 686  | 56.25              | 0.056             | 0.11                | 11.34 x10 <sup>-5</sup> | 2.27 x10 <sup>-6</sup> |
| 1097 | 89.95              | 0.090             | 0.18                | 18.13 x10 <sup>-5</sup> | 3.63 x10 <sup>-6</sup> |

Table S3 – Table showing ppm to moles conversion.

## Post-PEC Characterization

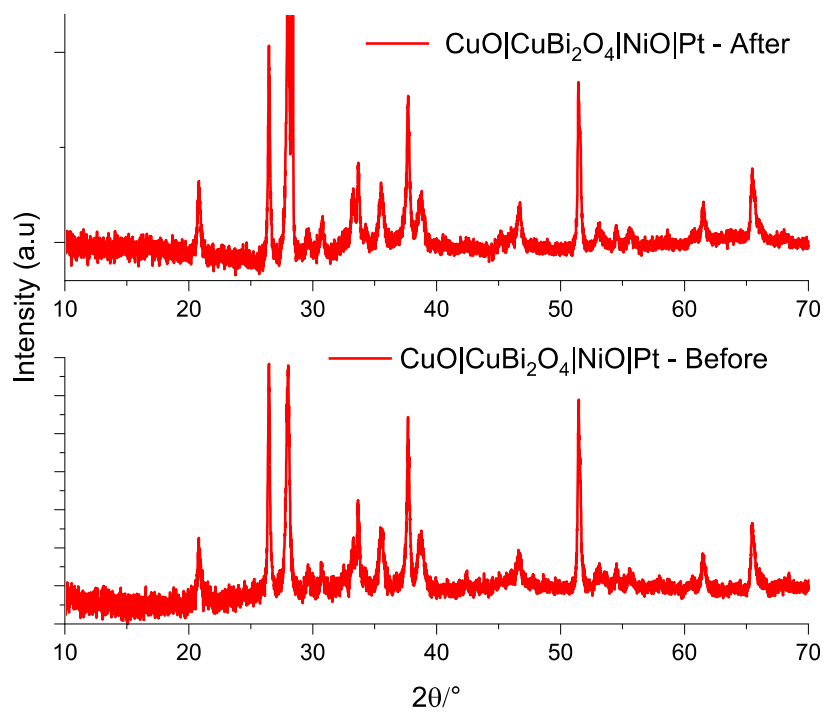

**Figure S19** – X-ray diffractogram of CuO|CuBi<sub>2</sub>O<sub>4</sub>|NiO|Pt before and after 3 hours of PEC at 0.4V vs RHE and 1 sun illumination (300W Xe lamp).

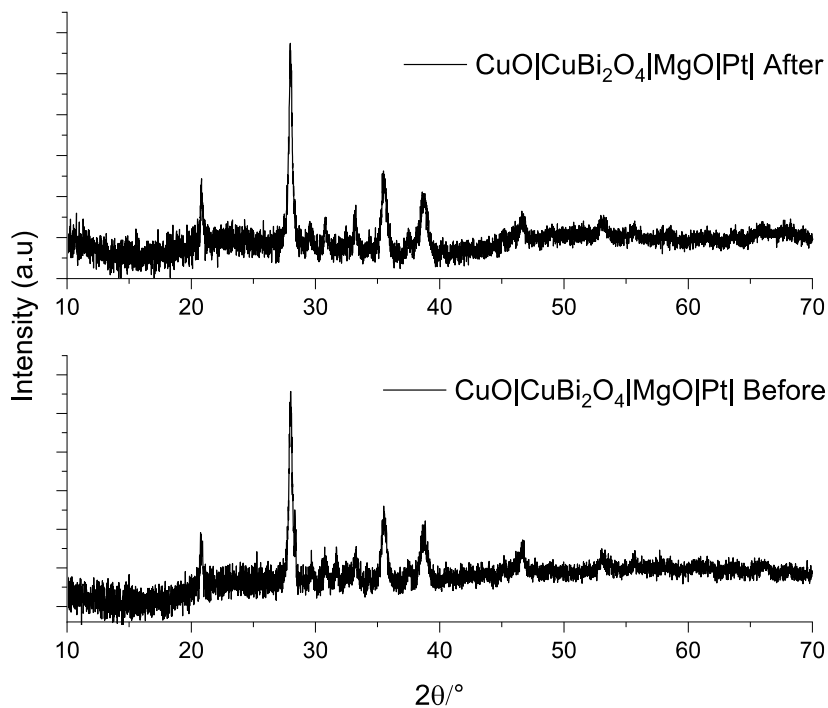

**Figure S20** – X-ray diffractogram of CuO|CuBi<sub>2</sub>O<sub>4</sub>|MgO|Pt before and after 3 hours of PEC at 0.4V vs RHE and 1 sun illumination (300W Xe lamp).

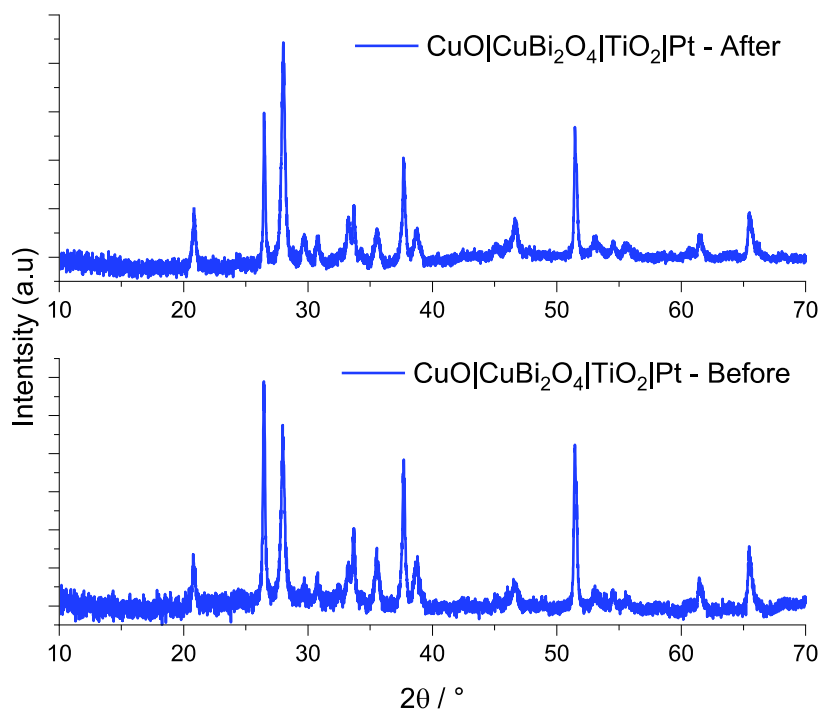

**Figure S21** – X-ray diffractogram of CuO|CuBi<sub>2</sub>O<sub>4</sub>|TiO<sub>2</sub>|Pt before and after 3 hours of PEC at 0.4V vs RHE and 1 sun illumination (300W Xe lamp).

## Additional Tandem Characterization

## Transient Absorption Spectroscopy Data

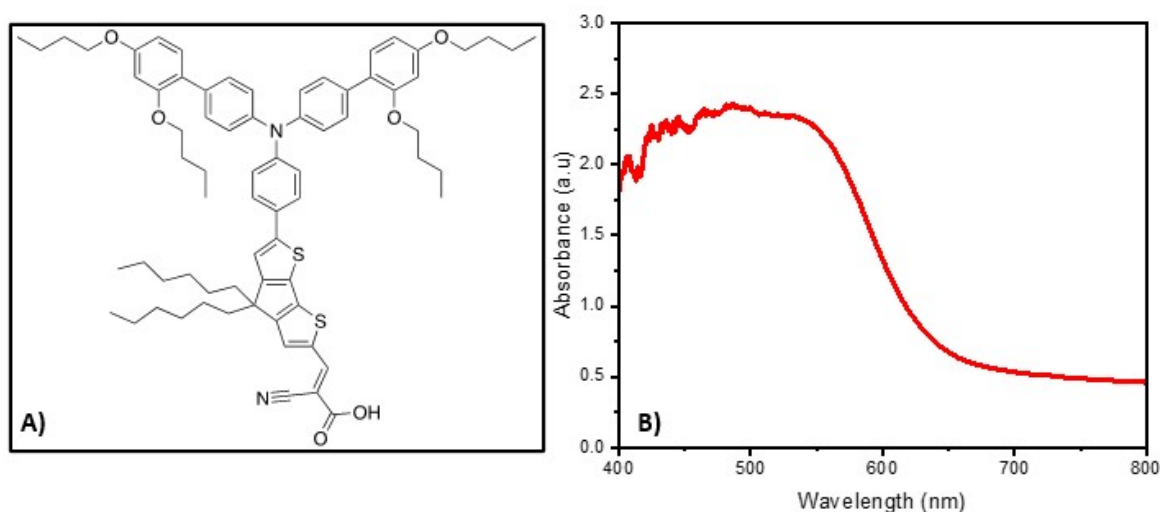Figure S22 – A) Molecular structure of LEG4 dye. B) UV-visible absorption spectroscopy of an FTO|TiO<sub>2</sub>|LEG4 film.

| Sample                                                 | Conditions  | Y0         | A1   | t <sub>1</sub> (ps) | A2    | t <sub>2</sub> (ps) | A <sub>3</sub> | t <sub>3</sub> (ps) |
|--------------------------------------------------------|-------------|------------|------|---------------------|-------|---------------------|----------------|---------------------|
| CuO                                                    | Dry         | -0.05±0.39 | 0.2  | 9.6±3.2             | 0.3   | 114.8±21.8          | 0.64           | 3720±499            |
|                                                        | Electrolyte | 0.24±0.01  | 0.26 | 0.7±0.2             | 0.296 | 7.54±0.9            | 0.192          | 1490±175            |
| CuO CuBi <sub>2</sub> O <sub>4</sub>                   | Electrolyte | 0.15±0.01  | 0.30 | 19.3±2.1            | 0.14  | 124.1±378.0         | 0.33           | 1180±185            |
|                                                        | Dry         | 0.15±0.01  | 0.50 | 4.8±0.4             | 0.46  | 944.85              | -              | -                   |
| CuO CuBi <sub>2</sub> O <sub>4</sub>  TiO <sub>2</sub> | Electrolyte | 0.15±0.03  | 0.3  | 39.9±5.6            | 0.2   | 339.6±187.6         | 0.19           | 1804±1450           |
|                                                        | Dry         | 0.20±0.01  | 0.26 | 5.3±0.6             | 0.2   | 71.0±6.3            | 0.26           | 1570±145            |
| CuO CuBi <sub>2</sub> O <sub>4</sub>  NiO              | Electrolyte | 0.16±0.01  | 0.27 | 1.7±0.2             | 0.4   | 48.7±3.6            | 0.2            | 1180±150            |
|                                                        | Dry         | 0.17±0.03  | 0.27 | 18.4±1.4            | 0.3   | 334.2±39.3          | 0.29           | 3910±1170           |
| CuO CuBi <sub>2</sub> O <sub>4</sub>  MgO              | Electrolyte | 0.19±0.01  | 0.28 | 2.0±0.2             | 0.2   | 53.9±5.4            | 0.26           | 1765±157            |
|                                                        | Dry         | 0.14±0.01  | 0.29 | 1.5±0.2             | 0.3   | 36.3±3.2            | 0.22           | 955.2               |

**Table S4** – Table compiling TA lifetimes for CuO, CuBi<sub>2</sub>O<sub>4</sub>, CuO|CuBi<sub>2</sub>O<sub>4</sub>, CuO|CuBi<sub>2</sub>O<sub>4</sub>|TiO<sub>2</sub>, CuO|CuBi<sub>2</sub>O<sub>4</sub>|MgO, CuO|CuBi<sub>2</sub>O<sub>4</sub>|NiO. Lifetimes were fitted as exponential decays following the equation:  $y = a_1 \cdot \exp(-x/t_1) + a_2 \cdot \exp(-x/t_2) + a_3 \cdot \exp(-x/t_3) + y_0$ . Y0 is a constant offset or a baseline value, y = change in absorbance, t<sub>x</sub> = lifetime component, and A<sub>x</sub> = pre-exponential coefficient. Weighted averages of each lifetime is shown in the right-hand column.

## Literature Comparison

| Photocathode                                 | Applied Potential (vs RHE) | Conditions                                                                                                      | Photocurrent Density (mA cm <sup>-2</sup> ) | Stable Operation Time (minutes) | Reference |
|----------------------------------------------|----------------------------|-----------------------------------------------------------------------------------------------------------------|---------------------------------------------|---------------------------------|-----------|
| CuO CuBi <sub>2</sub> O <sub>4</sub>  MgO Pt | 0.4 V                      | Electrolyte: 0.2 M KCl, 0.01 M H <sub>2</sub> KPO <sub>4</sub> , and 0.01 M HK <sub>2</sub> PO <sub>4</sub> (pH | 0.2                                         | 180                             | This work |



|                                                                             |       |                                                                                                                                                            |      |     |              |
|-----------------------------------------------------------------------------|-------|------------------------------------------------------------------------------------------------------------------------------------------------------------|------|-----|--------------|
|                                                                             |       | 7.2).                                                                                                                                                      |      |     |              |
|                                                                             |       | illumination:<br>300W Xe<br>lamp<br>calibrated<br>using to 1<br>sun (filtered<br>with an<br>AM1.5G<br>filter)                                              |      |     |              |
| CuO CuBi <sub>2</sub> O <sub>4</sub>  TiO <sub>2</sub>  Pt/MoS <sub>2</sub> | 0.4 V | As above.                                                                                                                                                  | 0.1  | 180 | This work    |
| CuO CuBi <sub>2</sub> O <sub>4</sub>  NiO Pt                                | 0.3 V | As above.                                                                                                                                                  | 0.3  | 180 | This work    |
| CuO CuBi <sub>2</sub> O <sub>4</sub>  Pt                                    | 0.4 V | As above.                                                                                                                                                  | 1.2  | <10 | This work    |
| CuBi <sub>2</sub> O <sub>4</sub>                                            | 0.2 V | 0.1 M<br>Na <sub>2</sub> SO <sub>4</sub>                                                                                                                   | 0.45 | ~3  | <sup>1</sup> |
| Bare CuBi <sub>2</sub> O <sub>4</sub>                                       | 0.6 V | 0.3 M K <sub>2</sub> SO <sub>4</sub><br>and 0.2 M<br>phosphate<br>buffer (pH 7)                                                                            | ~0.1 | 300 | <sup>2</sup> |
| Inverse opal<br>CuBi <sub>2</sub> O <sub>4</sub>                            | 0.6 V | K <sub>2</sub> SO <sub>4</sub> (0.3<br>M) and 0.2<br>M phosphate<br>buffer (pH<br>6.65) with H <sub>2</sub> O <sub>2</sub> as an<br>electron<br>scavenger. | 2.95 | 120 | <sup>3</sup> |
| CuBi <sub>2</sub> O <sub>4</sub> /Au/N,<br>Cu-C                             | 0.5 V | 0.3 M K <sub>2</sub> SO <sub>4</sub><br>and 0.2 M<br>Phosphate<br>buffer (pH<br>6.68)                                                                      | 0.3  | 50  | <sup>4</sup> |

|                                                |       |                                                                                                                                                              |       |     |   |
|------------------------------------------------|-------|--------------------------------------------------------------------------------------------------------------------------------------------------------------|-------|-----|---|
| CuBi <sub>2</sub> O <sub>4</sub>               | 0.6 V | 0.3 M K <sub>2</sub> SO <sub>4</sub><br>and 0.2 M<br>phosphate<br>buffer (pH<br>6.65) (With<br>H <sub>2</sub> O <sub>2</sub> as an<br>electron<br>scavenger) | ~0.97 | 120 | 5 |
| CuO CuBi <sub>2</sub> O <sub>4</sub>  NiO<br>x | 0.6 V | 0.1M NaOH<br>(pH 12.8)                                                                                                                                       | ~0.5  | 300 | 6 |
| CuO CuBi <sub>2</sub> O <sub>4</sub>           | 0 V   | 0.1 M<br>Na <sub>2</sub> SO <sub>4</sub>                                                                                                                     | ~0.4  | 120 | 7 |
| CuO CuBi <sub>2</sub> O <sub>4</sub>  Pt       | 0.2 V | pH 6.8, 0.3<br>M K <sub>2</sub> SO <sub>4</sub> , 0.1<br>M<br>phosphate,<br>deaerated                                                                        | 0.05  | 10  | 8 |

**Table S5** – Table detailing a comparison between key electrochemical parameters and stability of homologous systems from the present literature.

## References

1. R. Gottesman, A. Song, I. Levine, M. Krause, A. N. Islam, D. Abou-Ras, T. Dittrich, R. van de Krol and A. Chemseddine, *Adv. Funct. Mater.*, **2020**, *30*, 1910832.
2. S. Wei, N. Xu, F. Li, X. Long, Y. Hu, L. Gao, C. Wang, S. Li, J. Ma and J. Jin, *ChemElectroChem*, **2019**, *6*, 3367–3374.
3. D. A. Reddy, Y. Kim, P. Varma, M. Gopannagari, K. A. J. Reddy, D. H. Hong, I. Song, D. P. Kumar and T. K. Kim, *ACS Appl. Energy Mater.*, **2022**, *5*, 6050–6058.
4. N. Nasori, A. Rubiyanto and E. Endarko, *J. Phys.: Conf. Ser.*, **2019**, *1373*, 012016.
5. S. P. Berglund, F. F. Abdi, P. Bogdanoff, A. Chemseddine, D. Friedrich and R. van de Krol, *Chem. Mater.*, **2016**, *28*, 4231–4242.
6. Q. Zhang, B. Zhai, Z. Lin, X. Zhao and P. Diao, *Int. J. Hydrogen Energy*, **2021**, *46*, 11607–11620.
7. S. Pulipaka, N. Boni, G. Ummethala and P. Meduri, *J. Catal.*, **2020**, *387*, 17–27.
8. H. S. Park, C.-Y. Lee and E. Reisner, *Phys. Chem. Chem. Phys.*, **2014**, *16*, 22462–22465.
